# Supplementary material for: Bioactive peptide functionalized aligned cyclodextrin nanofibers for neurite outgrowth
Source: Royal Society of Chemistry journal article supplement (doi:10.1039/c6tb02441f), 2016-12-06
Supplement: c6tb02441f1.pdf [file c6tb02441f1.pdf]

**Electronic Supplementary Information (ESI)**

**for**

Bioactive Peptide Functionalized Aligned Cyclodextrin Nanofibers for Neurite Outgrowth

*Seren Hamsici,<sup>a</sup> Goksu Cinar,<sup>a</sup> Asli Celebioglu,<sup>a</sup> Tamer Uyar,<sup>a \*</sup> Ayse B. Tekinay,<sup>a \*</sup> and*

*Mustafa O. Guler<sup>a \*</sup>*

<sup>a</sup> Institute of Materials Science and Nanotechnology, National Nanotechnology Research

Center (UNAM), Bilkent University, Ankara 06800, Turkey

*\*Corresponding Author e-mail address: moguler@unam.bilkent.edu.tr (M.O.G.)*

*atekinay@unam.bilkent.edu.tr (A.B.T.), and uyar@unam.bilkent.edu.tr (T.U.)*

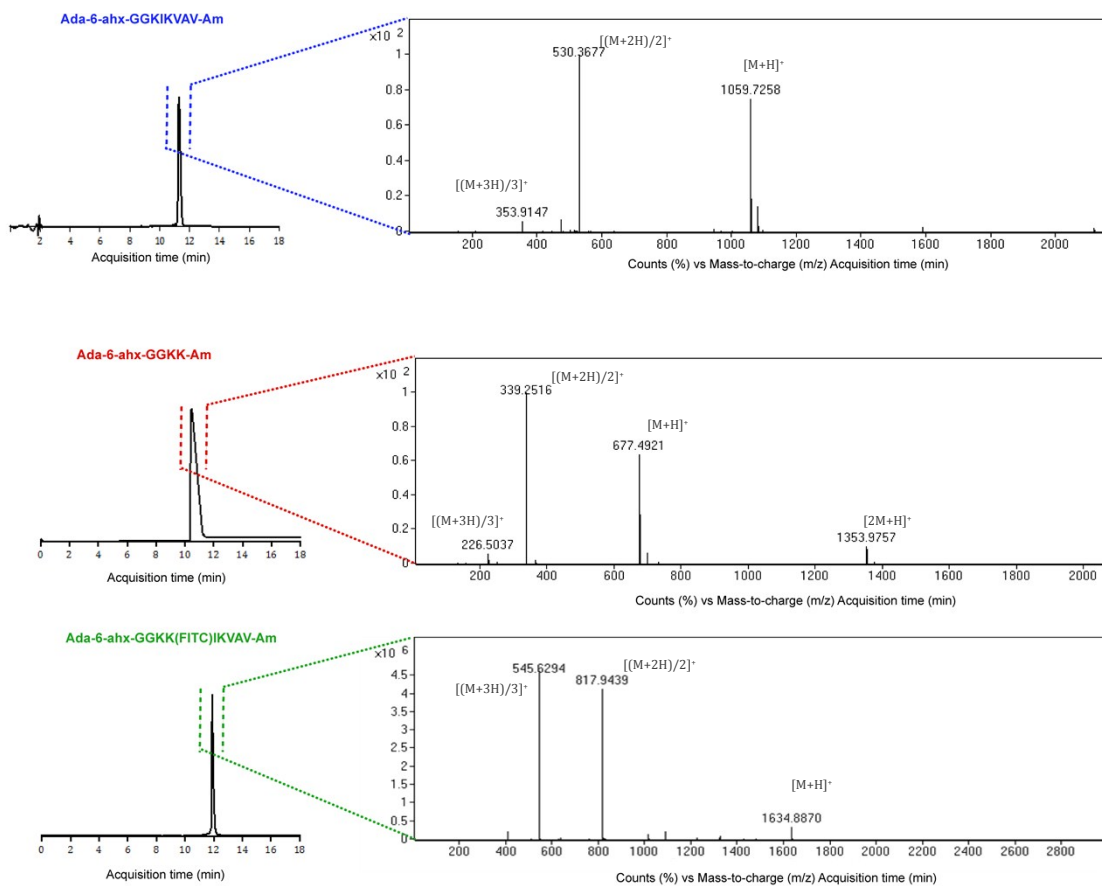

**Figure S1.** Liquid chromatography-mass spectrometry (LC-MS) analyses of the synthesized adamantane conjugated peptides.

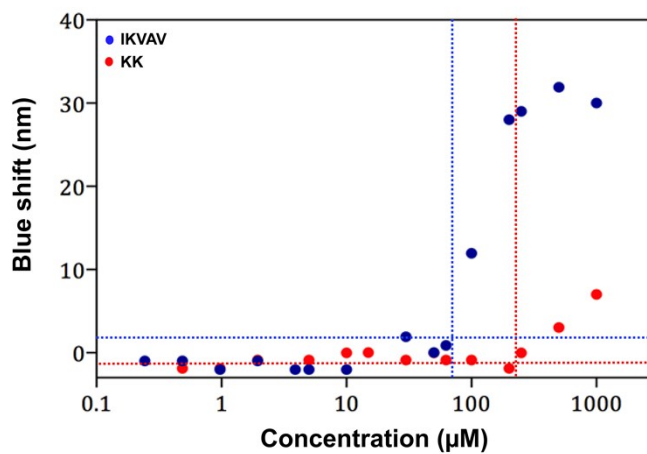

**Figure S2.** Blue shift of Nile Red in different concentrations of guest molecules. Formation of aggregation takes place for Ada-*IKVAV* and Ada-*KK* at concentration around 60 and 125  $\mu\text{M}$  respectively

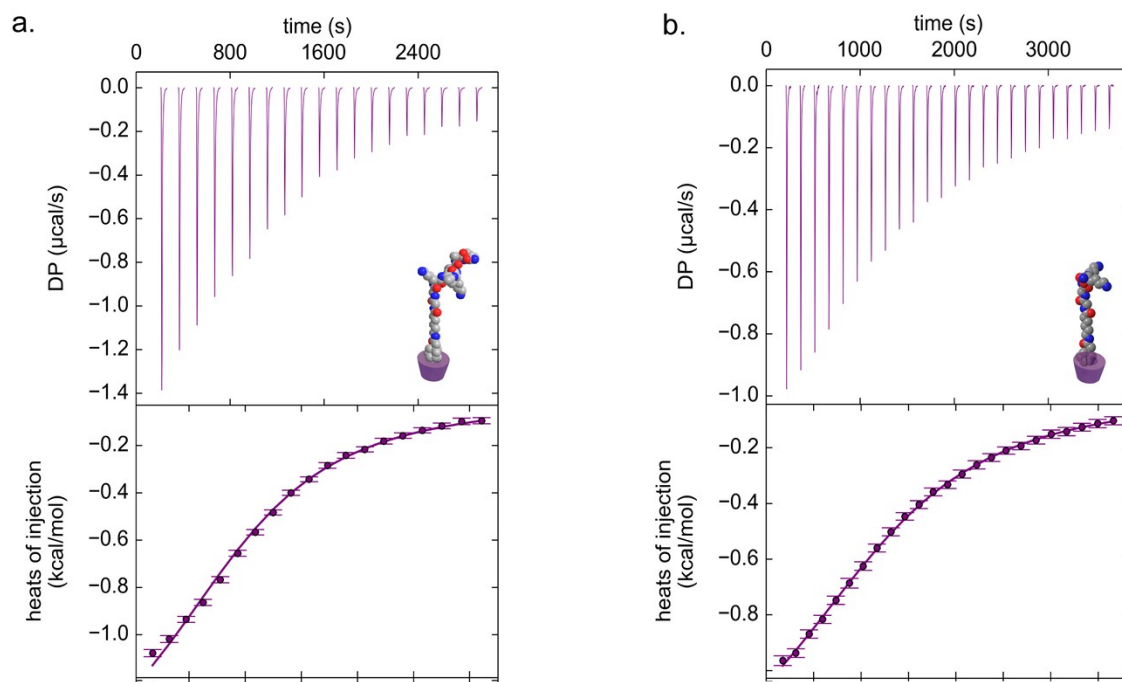

**Figure S3.** Isothermal Titration Calorimetry (ITC) traces of CD titrated into solutions of a) Ada-IKVAV, b) Ada-KK. The purple markers represent each injection, whereas the purple line fitted

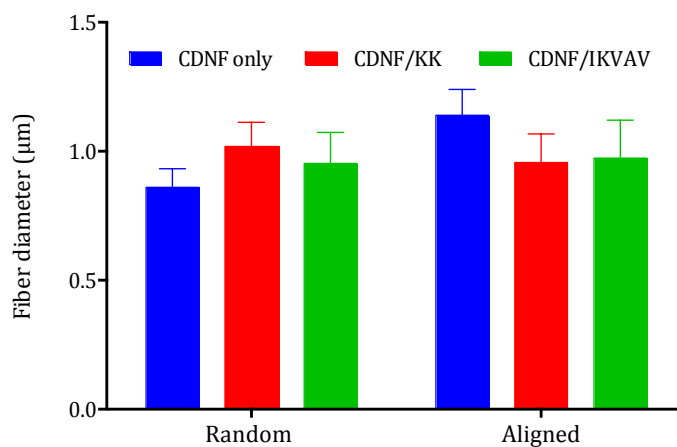

**Figure S4.** Fiber diameters of electrospun random and aligned CDNFs with their peptide functionalized forms. There were not any significant differences between groups in terms of fiber diameter.

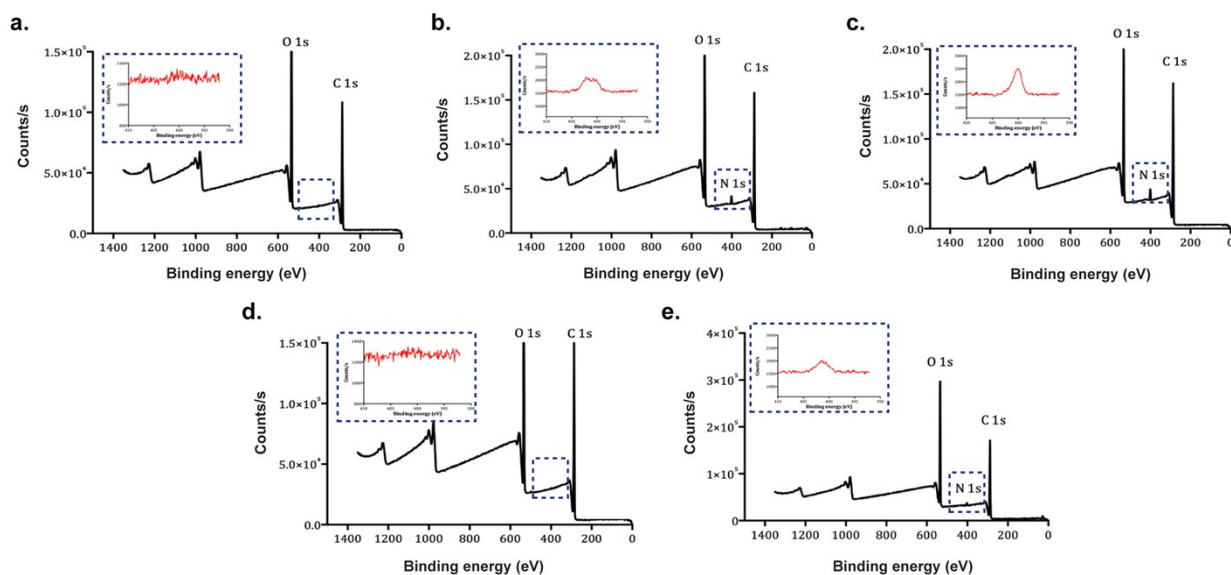

**Figure S5.** XPS analyses of random (a-c) and aligned (d-f) CDNFs. **a.** Random only CDNFs, **b.** Functionalized with Ada-KK, **c.** Ada-IKVAV, **d.** Aligned only CDNFs, **e.** Functionalized with Ada-KK.

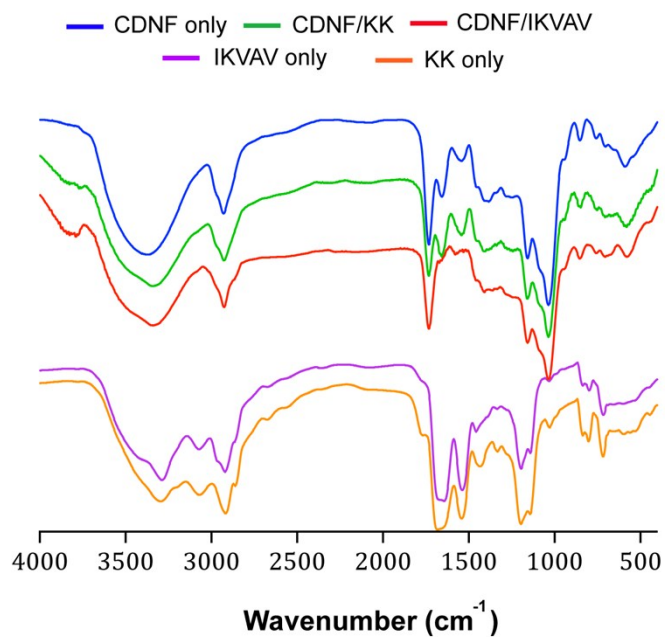

**Figure S6.** FT-IR spectrum of random organized CDNF only, CDNF/KK, CDNF/IKVAV and only bioactive and non-bioactive peptide molecules.

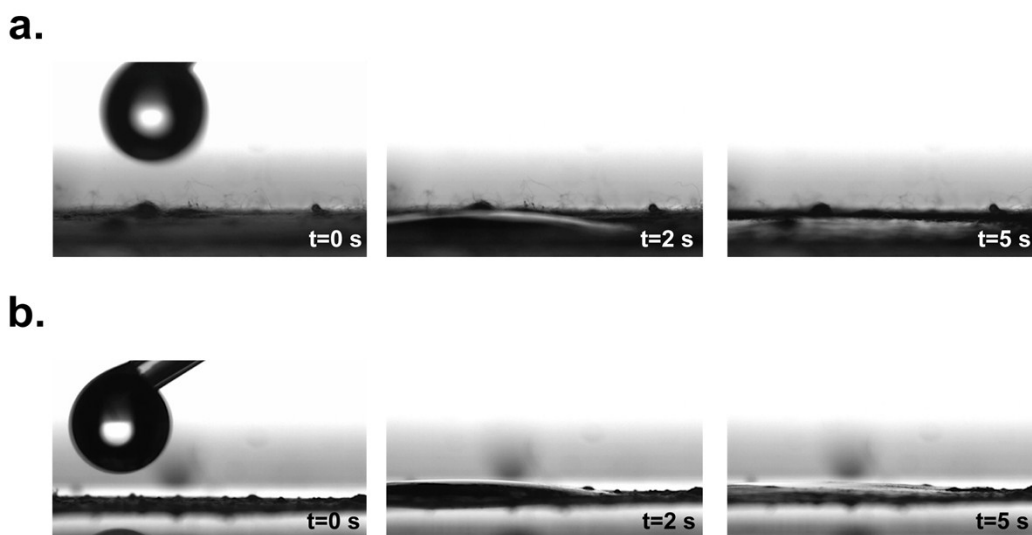

**Figure S7.** Contact angle analyses of **a.** random **b.** aligned CDNFs show wettability behavior.

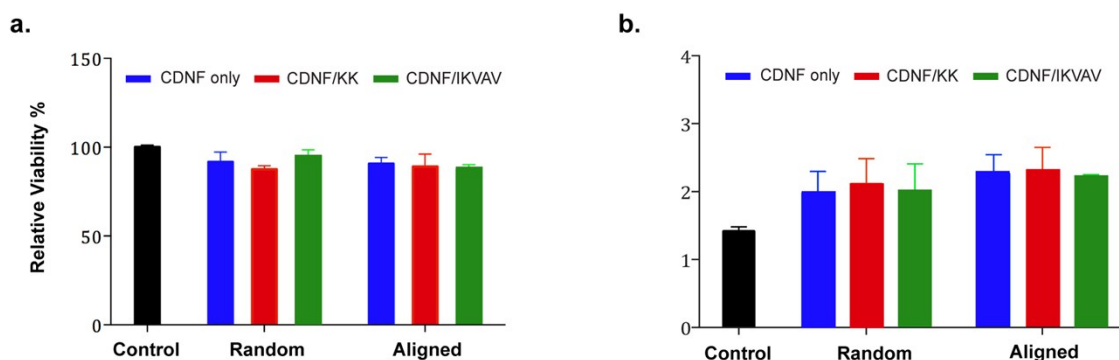

**Figure S8. a.** Relative viability on CDNFs after 48 h of incubation **b.** Cellular adhesion on CDNFs after 4 h of incubation

**Supplementary Table S1.** Atom weight percentages of random and aligned CDNFs and functionalized forms

|         |            | wt %C | wt %H | wt %N |
|---------|------------|-------|-------|-------|
| RANDOM  | CDNF       | 33.32 | 4.67  | -     |
|         | CDNF/KK    | 35.0  | 4.76  | 1.55  |
|         | CDNF/IKVAV | 34.46 | 4.77  | 2.37  |
| ALIGNED | CDNF       | 33.62 | 4.37  | -     |
|         | CDNF/KK    | 34.31 | 4.75  | 1.45  |
|         | CDNF/IKVAV | 35.14 | 4.86  | 2.40  |

**Supplementary Table S2.** Peptide amount in 100 g of functionalized random and aligned CDNFs.

| Peptide Amount (g) | Random CDNFs (g) | Aligned CDNFs (g) |
|--------------------|------------------|-------------------|
| <b>KK</b>          | 32.90            | 30.95             |
| <b>IKVAV</b>       | 30.62            | 30.81             |

**Supplementary Table S3.** Designed primers used for gene expression analysis

| Gene                                      | Forward Primer             | Reverse Primer             |
|-------------------------------------------|----------------------------|----------------------------|
| <b><math>\beta</math>-III<br/>Tubulin</b> | 5'-CCTGCCTCTTCGTCTCTAGC-3' | 5'-AACTTGGCCCCTATCTGGTT-3' |
| <b>SYN1</b>                               | 5'-CCAGCTCAACAAATCCCAGT-3' | 5'-TGGTCTCAGCTTTCACCTCA-3' |
| <b>GAPDH</b>                              | 5'-GTGCCAGCCTCGTCTCATA-3'  | 5'-AACTTGCCGTGGGTAGAGTC-3' |
